# Supplementary material for: Sodium Super Ionic Conductor-Type Hybrid Electrolytes for High Performance Lithium Metal Batteries
Source: MDPI journal article supplement (doi:10.3390/membranes13020201), 2023-02-06
Supplement: s1 [file s1]

# Sodium Super Ionic Conductor-Type Hybrid Electrolytes for High Performance Lithium Metal Batteries

Po-Yu Sung <sup>1</sup>, Mi Lu <sup>2</sup>, Chien-Te Hsieh <sup>1,3,\*</sup>, Yasser Ashraf Gandomi <sup>4,\*</sup>, Siyong Gu <sup>2</sup> and Wei-Ren Liu <sup>5,\*</sup>

<sup>1</sup> Department of Chemical Engineering and Materials Science, Yuan Ze University, Taoyuan 32003, Taiwan

<sup>2</sup> Key Laboratory of Functional Materials and Applications of Fujian Province, Xiamen University of Technology, Xiamen 361024, China

<sup>3</sup> Department of Mechanical, Aerospace, and Biomedical Engineering, University of Tennessee, Knoxville, TN 37996, USA

<sup>4</sup> Department of Chemical Engineering, Massachusetts Institute of Technology, Cambridge, MA 02142, USA

<sup>5</sup> Department of Chemical Engineering, Chung Yuan Christian University, Taoyuan 32023, Taiwan

\* Correspondence: cthsieh@saturn.yzu.edu.tw (C.-T.H.); ygandomi@mit.edu (Y.A.G.); wrliu1203@gmail.com (W.-R.L.)

**Table S1.** The ionic conductivities from various CSE layers in Li-metal batteries, where CSE thickness = 40  $\mu\text{m}$  and C content: 7 wt. %.

| LiTFSI/LATP ratio | Ionic conductivity ( $\text{S cm}^{-1}$ ) |
|-------------------|-------------------------------------------|
| 1.5               | $1.15 \times 10^{-4}$                     |
| 1.8               | $1.83 \times 10^{-4}$                     |
| 2.0               | $2.83 \times 10^{-4}$                     |

**Table S2.** The ionic conductivities from various CSE layers in Li-metal batteries, where LiTFSI/LATP ratio = 1.5 and C content: 7 wt. %.

| CSE thickness ( $\mu\text{m}$ ) | Ionic conductivity ( $\text{S cm}^{-1}$ ) |
|---------------------------------|-------------------------------------------|
| 40                              | $1.15 \times 10^{-4}$                     |
| 70                              | $9.98 \times 10^{-5}$                     |
| 100                             | $5.01 \times 10^{-5}$                     |

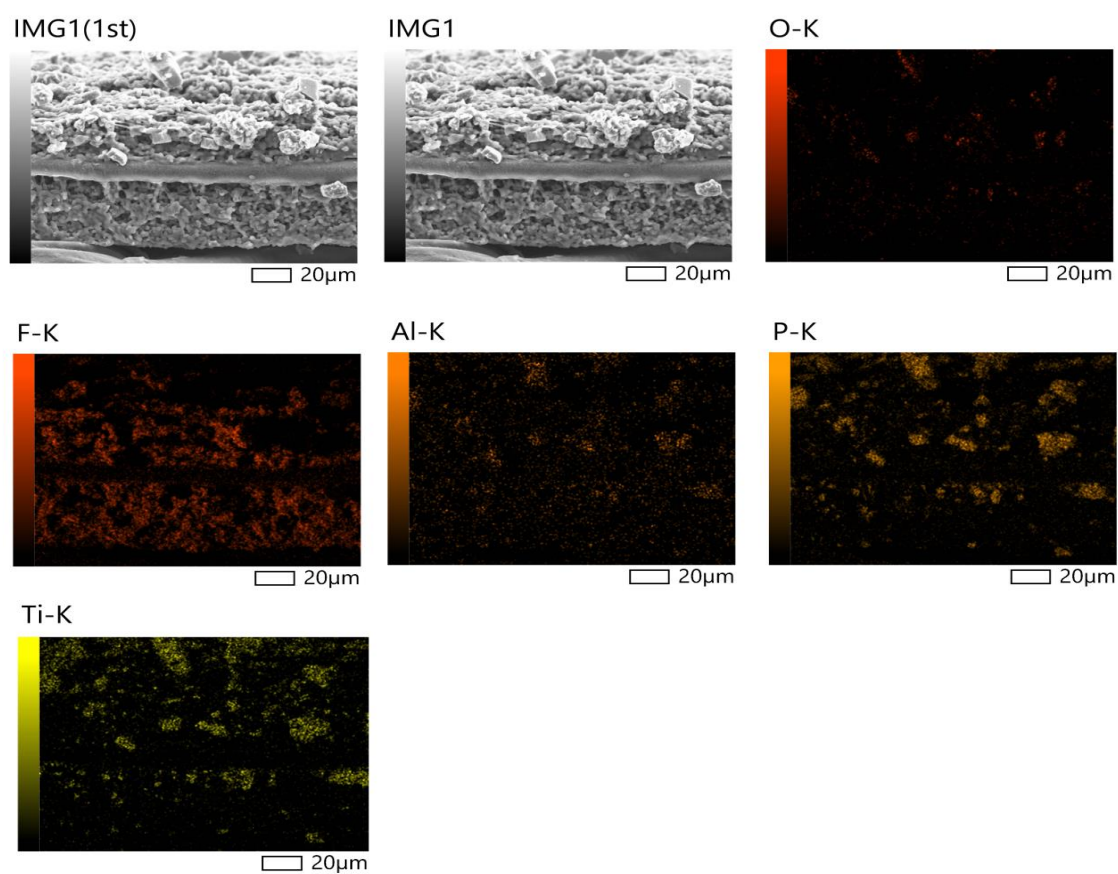

**Figure S1.** Cross-sectional view and elemental mapping on CSE-coated LFP cathode sheet.
